# Supplementary material
Source: PubMed Central journal article supplement (PMC6071911)
Supplement: NIHMS982607-supplement.pdf [file NIHMS982607-supplement.pdf]

## Supporting Information

### Engineering A11 minibody-conjugated, polypeptide-based gold nanoshells for prostate stem cell antigen (PSCA)-targeted photothermal therapy

*Kristine M. Mayle,<sup>1</sup> Kathryn R. Dern,<sup>1</sup> Vincent K. Wong,<sup>1</sup> Kevin Y. Chen<sup>1</sup>, Shijun Sung,<sup>2</sup> Ke Ding,<sup>1</sup> April R. Rodriguez,<sup>1</sup> Scott Knowles<sup>3</sup>, Zachary Taylor,<sup>1,4</sup> Z. Hong Zhou,<sup>1,5,6</sup> Warren S Grundfest,<sup>1,2,4</sup> Anna M. Wu,<sup>3</sup> Timothy J Deming,<sup>1</sup> and Daniel T Kamei<sup>1,\*</sup>*

<sup>1</sup>Department of Bioengineering, University of California, Los Angeles, CA 90095

<sup>2</sup>Department of Electrical Engineering, University of California, Los Angeles, CA 90095

<sup>3</sup>Department of Molecular and Medical Pharmacology, University of California, Los Angeles CA 90095

<sup>4</sup>Department of Surgery, University of California, Los Angeles, CA 90095

<sup>5</sup>Department of Microbiology, Immunology & Molecular Genetics, University of California, Los Angeles, CA 90095

<sup>6</sup>California NanoSystems Institute, University of California, Los Angeles, CA 90095

\*Corresponding Author: Prof. Daniel T. Kamei, [kamei@seas.ucla.edu](mailto:kamei@seas.ucla.edu)

Keywords: polypeptide vesicles; photothermal therapy; gold nanoshells

## A11 Internalization Experiments

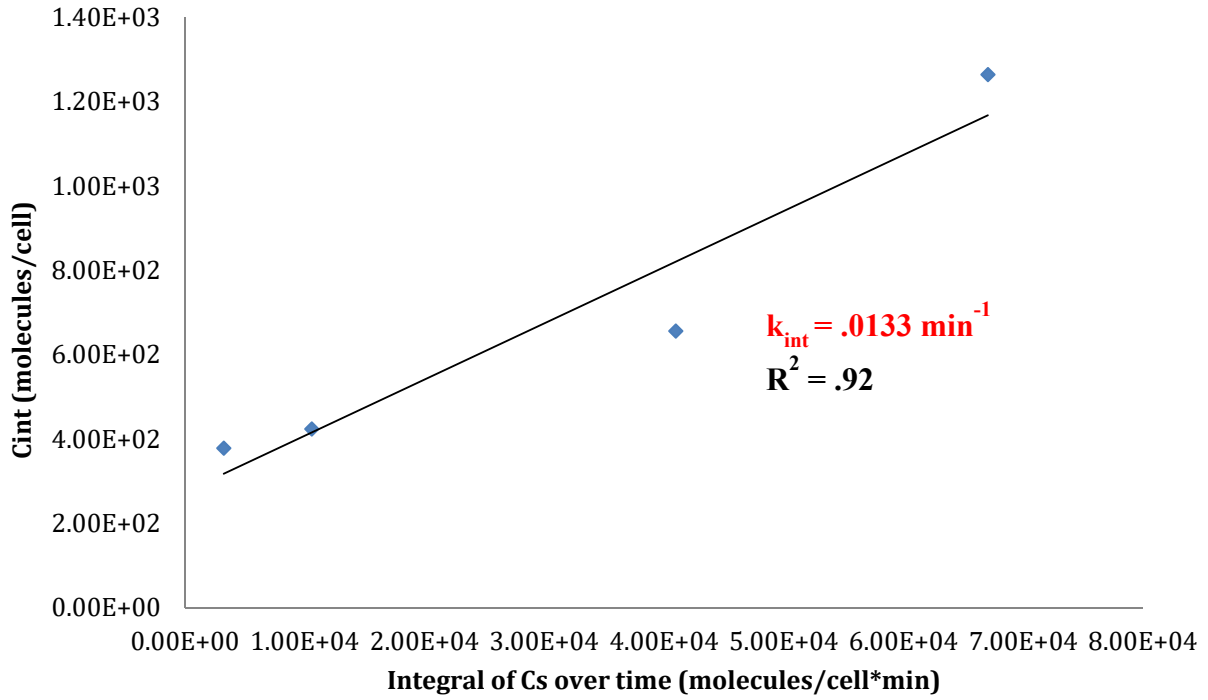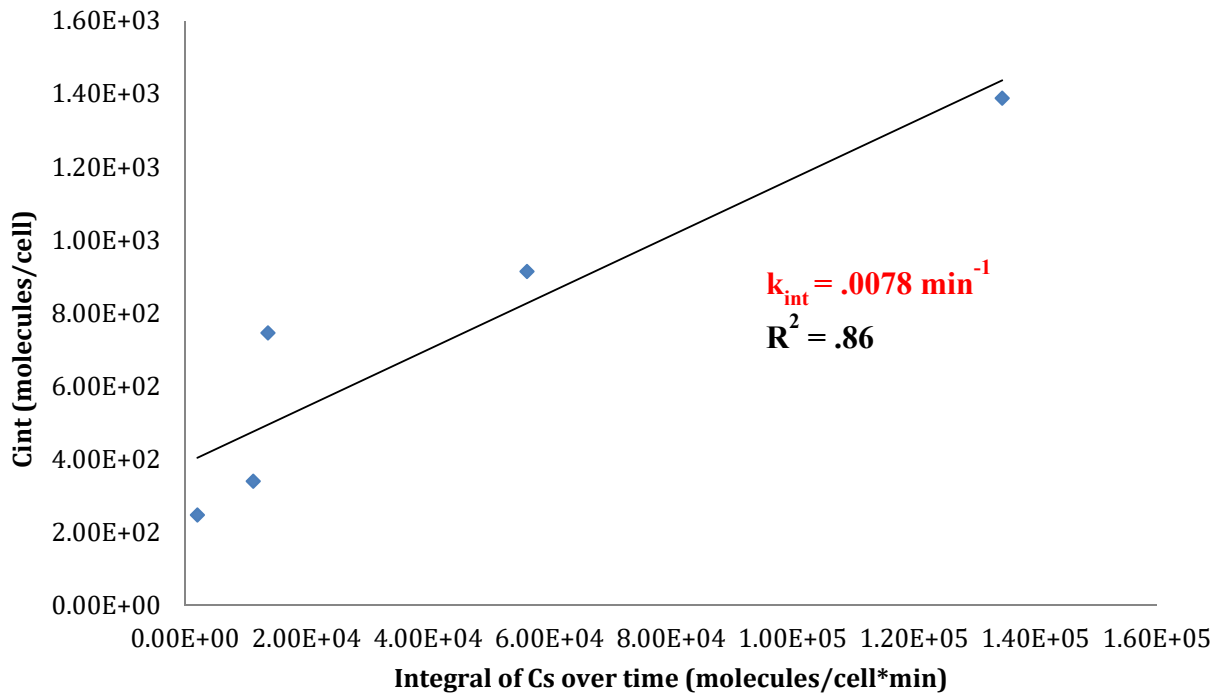

**Figure S1.** The other 2 runs of the A11 internalization experiment, which was run in triplicate. The third run is shown in the manuscript

### TEM Image and DLS Data of Naked GKL

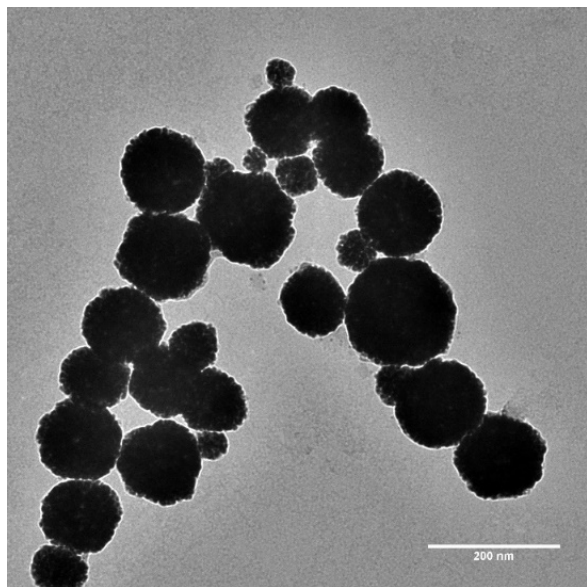

**Figure S2.** TEM image of the naked GKL. Scale bar is 200 nm. (Note that the DLS data indicated that the gold nanoshells are  $148 \pm 3$  nm in diameter with a polydispersity index (PDI) of  $0.11 \pm 0.01$ .)
